# Supplementary material
Source: MDPI journal article supplement (https://www.mdpi.com/2071-1050/9/12/2227)
Supplement: s1 [file s1]

# Supplementary Material

## Evaluating the Environmental Consequences of Swedish Food Consumption and Dietary Choices

Michael Martin <sup>1,\*</sup> and Miguel Brandão <sup>2</sup>

<sup>1</sup> IVL Swedish Environmental Research Institute, Valhallavägen 81, 114 27 Stockholm, Sweden

<sup>2</sup> KTH—Royal Institute of Technology, Department of Sustainable Development, Environmental Science and Engineering, Teknikringen 34, 114 28 Stockholm, Sweden; miguel.brandao@abe.kth.se

\* Correspondence: michael.martin@ivl.se

### A1 Scenarios

Scenarios were created to assess the environmental implications of dietary choices on the aggregated impacts of Swedish food consumption. These included increased organic food consumption, increased Swedish foods, reduced meat consumption and diets based on recommendations from Livsmedelsverket (*Swedish National Food Agency*). These scenarios are split into those considered “transition” diets requiring small changes to those requiring large changes, as described in the following sections. The following sections provide a short review of these scenarios.

For the study, a reference year of 2011 was used based on the latest data available from the FAO food balance data sheets. Thereafter, scenarios for different dietary choices were assessed for the years 2015 and 2020 in order to review how the impacts may change with increased population; See Table S1.

Table S1: Population for years 2012, 2015 and 2020 in thousand persons [1]

| 2011  | 2015  | 2020 |
|-------|-------|------|
| 9 482 | 9 879 | 09   |

#### A1.1 Transition Diets

##### Scenario 0 –Default Scenario

In order to model consumption in 2015 and 2020 using per capita consumption figures from 2011, Scenario 0 (Default Scenario) was created to allow for comparisons with other scenarios for 2015 and 2020 respectively. Therefore, Scenario 0 (for both 2015 and 2020) does not take into account increases or decreases in per capita consumption of foods and is used to also understand how population affects the environmental impacts of food production and consumption.

##### Reduced Meat Consumption

The *Reduced Meat* scenarios in 2015 and 2020 will review reductions in meat consumption. These are assumed to include meat consumption reductions of 25% and 50% in 2015 and 2020 respectively per capita. While meat consumption is reduced, the consumption of vegetables and pulses are increased by 25% and 50% respectively in 2015 and 2020, to make up for this reduction in meat to allow for a protein substitute, despite current levels of high protein consumption. Final consumption of food is kept similar to Scenario 0 and other scenarios (except for the Nutritional scenario) as outlined in this section.

Table S2: Increase and Decrease of RFPs in the *Reduced Meat* scenario

| RFP        | 2015          | 2020          |
|------------|---------------|---------------|
| Meat       | 25% reduction | 50% reduction |
| Vegetables | 25% increase  | 50% increase  |
| Pulses     | 25% increase  | 50% increase  |

### Increased Organic Food Consumption (Scenarios ECO and Eco-Sweden)

According to Ecoweb we can expect an increase in the sales of organic food with 2 billion SEK yearly between 2015 and 2025 [2]. Based on figures provided by Ekoweb, an increase in organic food sales of 100% can be seen from figures in 2011 to 2015. Thereafter, for 2020, a corresponding increase of 200% is outlined from 2011.

As the scenarios investigated an increase in organic food consumption, a reduction in conventional food consumption was also taken into account. In *Scenario ECO* a reduction in both conventional foods from imports and Swedish foods were considered. In several cases the increase in organic foods included more food than the per capita amounts for 2011. Therefore, in order for the per capita amounts to hold, the increase was reduced in only a few cases.

*Scenario ECO-Sweden* reviews the potential for an increase in Swedish organic food production and consumption. In this scenario, conventional food production in Sweden is replaced with the increased amount of organic food as it assumes a shift toward organic production in Sweden.

### Increase Swedish Food Production

Scenarios were created to understand the implications of increased Swedish food production. No recommendations could be found in the literature, although a number of gray literature reports provide support for more Swedish production of foods. Therefore, in order to review the potential for Swedish food production, the scenarios included increases of 10% and 30% for each respective food product with Swedish origin, labelled as *Swedish Increase (Sweden Incr.* in the figures) respectively for 2015 and 2020. In some cases there is no increase, as certain food products do not originate in Sweden (e.g. bananas, coffee, etc.). The increase only included conventional foods and not organic food production in Sweden as this was reviewed separately.

#### A1.2 Profoundly Changed Diets

The following scenarios review hypothetical scenarios where the entire population ate a vegetarian diet, ate based on nutritional recommendations and diets based on only conventional and organic foods to understand how these hypothetical diets could affect the environmental performance of Swedish food consumption.

### Vegetarian Diet

This scenario was created to understand the implications of widespread vegetarianism in Sweden. In the scenario, no meat was considered to be consumed, although eggs, fish and milk products remained in the diet<sup>1</sup>. Relative consumption figures take inspiration from work conducted by [3]. In the aforementioned study, the consumption of root vegetables and beans were roughly 4 times greater than an average diet and vegetables were roughly the same. In order to keep the amount of calories similar to Scenario 0, the following assumptions were made:

- 4x Increase in Soy Products, Beans and Peas
- 3x Increase in Potatoes

<sup>1</sup> Demi-vegetarianism refers to individual who do not eat meat or poultry, but consume fish, eggs and milk products.

### 1.5x Increase in Vegetable Consumption

All other representative food product amounts were kept similar to Scenario 0 for the respective years. See the Appendix for the final amounts of food in the Vegetarian scenarios for 2015 and 2020.

### Vegan Diet

Based on the consumption figures of the semi-vegetarian diets outlined above and comparing with the figures provided in [4] diet with Vegan diets, the following changes (factors) in the diets were noted. Notably, the increase of soya beans was increased by 600%.

Table S3: Changes in Food Consumption for Vegan Diets

| Product                  | Factor |
|--------------------------|--------|
| Milk - Excluding Butter  | 0      |
| Sugar Crops              | 1.0    |
| Cereals - Excluding Beer | 1.3    |
| Fruits - Excluding Wine  | 1.4    |
| Vegetables               | 1.3    |
| Meat                     | 0      |
| Alcoholic Beverages      | 1.0    |
| Starchy Roots            | 1.2    |
| Sugar & Sweeteners       | 1.0    |
| Oil crops                | 1.0    |
| Fish, Seafood            | 0      |
| Animal fats              | 0      |
| Vegetable Oils           | 1.0    |
| Stimulants               | 1.0    |
| Eggs                     | 0      |
| Treenuts                 | 3      |
| Pulses                   | 4      |
| Spices                   | 1.3    |
| Offals                   | 0      |
| Miscellaneous            | 1.0    |

### Nutritional Recommendations

The importance of a nutritional diet has become increasingly important for many consumers. A scenario was created to take into account healthy diets and assuming that consumers roughly follow the guidelines from the Swedish Food Agency (Livsmedelsverket).

In this scenario, labelled *Nutrition*, dietary guidelines from Livsmedelsverket were used. The guidelines are based on the "Nordic Nutritional recommendations 2012;" see Table S4 below for a summary of the recommended daily and weekly consumption figures and the Appendix for values used for yearly consumption.

The recommendations were used to calculate the total consumption (including waste) of food in 2015 and 2020 respectively. When doing so, the calorie count was below the recommended values. Therefore, in order to account for the range of nutritional intake guidelines based on age, sex and activity levels, 130% of the recommended amount was used. As such, the final consumption figures based on values from Livsmedelsverket were used to calculate wastes from production, retail and households, as considered in other scenarios. For food products where there are no guidelines, the amounts per capita and year are kept similar to amounts provided per capita as used in other scenarios. This scenario resulted in a reduced overall food consumption in comparison with that used in the other scenarios; see the Appendix.

Table S4: Recommendations from Livsmedelsverket on Food Consumption given in Amounts per day, week respectively

| Foodstuff                                                           | Amount                                                                                   |
|---------------------------------------------------------------------|------------------------------------------------------------------------------------------|
| Green vegetables, root vegetables, legumes, fruit and berries       | A total of at least 500 grams vegetables and fruit per day                               |
| Nuts and seeds                                                      | A couple of tablespoons a day (30 grams)                                                 |
| Bread, grains, pasta, rice                                          | about 70 grams per day for women and 90 grams for men upholds.                           |
| Dairy products                                                      | 2-5 dl milk, curdled milk and yoghurt per day, or enriched plant-based drinks            |
| Fish and shellfish                                                  | Fish 2-3 times a week, of which one a fatty fish, one portion is about 125 grams.        |
| Meat from cows, pigs, lambs, reindeer and game, and processed meats | No more than in total 500 grams of meat from cows, pigs, lambs, reindeer and game a week |

### A1.3 All Organic vs. All Conventional

In order to show the differences captured for comparing organic and conventional foods, scenarios were created to understand the differences between the two systems. In Scenario *All ECO*, all outlined consumption of conventional food was replaced with an equivalent amount of organic food in each category (i.e. Swedish and imports). Scenario *All Conv.* replaces all organic food in each category with conventional foods.

### A2 Method and other Assumptions

Table S5: Food Categories and Products Included in Study based on FAO Stat Food Balance Sheets

| Food Category            | Product                | Food Category  | Product                  |
|--------------------------|------------------------|----------------|--------------------------|
| Milk- Excluding Butter   | Milk                   | Fish, Seafood  | Crustaceans              |
| Sugar Crops              | Sugar beet             |                | Freshwater Fish          |
| Cereals - Excluding Beer | Wheat and products     |                | Demersal Fish            |
|                          | Rye and products       |                | Pelagic Fish             |
|                          | Barley and products    | Animal fats    | Cream                    |
| Fruits - Excluding Wine  | Oranges, Mandarines    |                | Butter, Ghee             |
|                          | Fruits, Other          | Vegetable Oils | Palm Oil                 |
|                          | Apples and products    |                | Rape and Mustard Oil     |
|                          | Bananas                |                | Sunflower Oil            |
| Vegetables               | Vegetables, Other      | Stimulants     | Coffee and products      |
|                          | Tomatoes and products  |                | Cocoa Beans and products |
| Meat                     | Pork                   | Eggs           | Eggs                     |
|                          | Bovine                 | Tree nuts      | Nuts and products        |
|                          | Poultry                | Pulses         | Peas                     |
| Alcoholic Beverages      | Beer                   |                | Beans                    |
|                          | Wine                   | Spices         | Spices, Other            |
| Starchy Roots            | Potatoes and products  |                | Pepper                   |
| Sugar & Sweeteners       | Sugar (Raw Equivalent) |                | Pimento                  |
| Oilcrops                 | Rape and Mustard seed  | Offals         | Offals, Edible           |

|  |                  |               |             |
|--|------------------|---------------|-------------|
|  | Oil crops, Other | Miscellaneous | Infant food |
|  | Soya beans       |               |             |

Table S6: Per Capita Consumption for different Representative Food Products in 2011, measured in kg per year (FAOStat, 2015), see Appendix for final amounts used in the reviewed scenarios.

| Category                 | RFP              | Amount per RFP [kg/yr] | Amount per Category [kg/yr] |
|--------------------------|------------------|------------------------|-----------------------------|
| Milk - Excluding Butter  | Milk             | 341.07                 | 341.07                      |
| Sugarbeet                | Sugarbeet        | 240.98                 | 240.98                      |
| Cereals - Excluding Beer | Wheat            | 108.37                 | 131.20                      |
|                          | Rye              | 12.43                  |                             |
|                          | Barley           | 10.40                  |                             |
| Fruits - Excluding Wine  | Oranges          | 64.43                  | 143.88                      |
|                          | Fruits_Other     | 31.40                  |                             |
|                          | Apples           | 30.30                  |                             |
|                          | Bananas          | 17.75                  |                             |
| Vegetables               | Vegetables_Other | 68.94                  | 93.53                       |
|                          | Tomatoes         | 24.58                  |                             |
| Meat                     | Pig              | 39.62                  | 82.78                       |
|                          | Bovine           | 25.34                  |                             |
|                          | Poultry          | 17.82                  |                             |
| Alcoholic Beverages      | Beer             | 56.87                  | 77.52                       |
|                          | Wine             | 20.65                  |                             |
| Starchy Roots            | Potatoes         | 61.22                  | 61.22                       |
| Sugar & Sweeteners       | Sugar            | 42.82                  | 42.82                       |
| Oilcrops                 | Rapeseed         | 36.54                  | 41.43                       |
|                          | Oilcrop_Other    | 2.50                   |                             |
|                          | Soyabeans        | 2.40                   |                             |
| Fish, Seafood            | Crustaceans      | 8.03                   | 30.70                       |
|                          | Freshwater       | 7.81                   |                             |
|                          | Demersal         | 7.72                   |                             |
|                          | Pelagic          | 7.14                   |                             |
| Animal fats              | Cream            | 16.05                  | 20.45                       |
|                          | Butter           | 4.40                   |                             |
| Vegetable Oils           | Palm Oil         | 11.29                  | 16.87                       |
|                          | Rapseed Oil      | 2.98                   |                             |
|                          | Sunflower Oil    | 2.61                   |                             |
| Stimulants               | Coffee           | 10.57                  | 12.97                       |
|                          | Cocoa            | 2.40                   |                             |
| Eggs                     | Eggs             | 12.34                  | 12.34                       |
| Treenuts                 | Nuts             | 4.53                   | 4.53                        |

|                      |              |      |      |
|----------------------|--------------|------|------|
| <b>Pulses</b>        | Peas         | 1.52 | 1.90 |
|                      | Beans        | 0.38 |      |
| <b>Spices</b>        | Spices_Other | 0.53 | 0.95 |
|                      | Pepper       | 0.21 |      |
|                      | Pimento      | 0.21 |      |
| <b>Offals</b>        | Offals       | 0.84 | 0.84 |
| <b>Miscellaneous</b> | Infant Food  | 0.32 | 0.32 |

Table S7: Scaling factors for the different diets to denote increases or reductions

|                     | Scen. 0 | Reduce Meat | Eco <sup>1</sup> | Eco SWE <sup>2</sup> | SWE Incr. <sup>3</sup> | Veget. | Vegan | All Conv <sup>4</sup> | All Eco <sup>5</sup> |
|---------------------|---------|-------------|------------------|----------------------|------------------------|--------|-------|-----------------------|----------------------|
| Milk                | 1.0     | 1.0         | 2.0              | 2.0                  | 1.1                    | 1.0    | 0.0   | 1.0                   | 1.0                  |
| Sugar Crops         | 1.0     | 1.0         | 2.0              | 2.0                  | 1.1                    | 1.0    | 1.0   | 1.0                   | 1.0                  |
| Cereals             | 1.0     | 1.0         | 2.0              | 2.0                  | 1.1                    | 1.0    | 1.3   | 1.0                   | 1.0                  |
| Fruits              | 1.0     | 1.0         | 2.0              | 2.0                  | 1.1                    | 1.0    | 1.4   | 1.0                   | 1.0                  |
| Vegetables          | 1.0     | 1.3         | 2.0              | 2.0                  | 1.1                    | 1.5    | 1.3   | 1.0                   | 1.0                  |
| Meat                | 1.0     | 0.75        | 2.0              | 2.0                  | 1.1                    | 0.0    | 0.0   | 1.0                   | 1.0                  |
| Alcoholic Beverages | 1.0     | 1.0         | 2.0              | 2.0                  | 1.1                    | 1.0    | 1.0   | 1.0                   | 1.0                  |
| Starchy Roots       | 1.0     | 1.0         | 2.0              | 2.0                  | 1.1                    | 2.0    | 1.2   | 1.0                   | 1.0                  |
| Sugar & Sweeteners  | 1.0     | 1.0         | 2.0              | 2.0                  | 1.1                    | 1.0    | 1.0   | 1.0                   | 1.0                  |
| Oilcrops            | 1.0     | 1.0         | 2.0              | 2.0                  | 1.1                    | 1.0    | 1.0   | 1.0                   | 1.0                  |
| Fish, Seafood       | 1.0     | 1.0         | 2.0              | 2.0                  | 1.1                    | 1.0    | 0.0   | 1.0                   | 1.0                  |
| Animal fats         | 1.0     | 0.8         | 2.0              | 2.0                  | 1.1                    | 0.0    | 0.0   | 1.0                   | 1.0                  |
| Vegetable Oils      | 1.0     | 1.0         | 2.0              | 2.0                  | 1.1                    | 1.0    | 1.0   | 1.0                   | 1.0                  |
| Stimulants          | 1.0     | 1.0         | 2.0              | 2.0                  | 1.1                    | 1.0    | 1.0   | 1.0                   | 1.0                  |
| Eggs                | 1.0     | 1.0         | 2.0              | 2.0                  | 1.1                    | 1.0    | 0.0   | 1.0                   | 1.0                  |
| Treenuts            | 1.0     | 1.0         | 2.0              | 2.0                  | 1.1                    | 1.0    | 3.0   | 1.0                   | 1.0                  |
| Pulses              | 1.0     | 1.3         | 2.0              | 2.0                  | 1.1                    | 4.0    | 4.0   | 1.0                   | 1.0                  |
| Spices              | 1.0     | 1.0         | 2.0              | 2.0                  | 1.1                    | 1.0    | 1.3   | 1.0                   | 1.0                  |
| Offals              | 1.0     | 1.0         | 2.0              | 2.0                  | 1.1                    | 1.0    | 0.0   | 1.0                   | 1.0                  |
| Miscellaneous       | 1.0     | 1.0         | 2.0              | 2.0                  | 1.1                    | 1.0    | 1.0   | 1.0                   | 1.0                  |

### A3 Waste from Production, Retail and Households

At each stage of the life cycle, there are differences in the amount of wastes assumed for each RFP. The assumptions are based on figures provided in Martin et al. (2015); see Table S8. The figures are calculated based on the amount of food wastes arising from accumulated inputs to the different life

cycle stages. As an example, of the foods from produced from cereals, 16% of the food produced is destined as waste from the production phases, thereafter 2% of that entering the retail sector is destined as waste and finally 25% is destined as waste from that available to households. Although food waste and the production of food to produce this waste leads to large environmental impacts, changes in food waste handling and mitigation were not reviewed in this study.

Table S8: Waste from Different Stages of the Life Cycle Accounted for in this study based on information from (Martin et al, 2015)

|                     | Production | Retail | Households |
|---------------------|------------|--------|------------|
| Cereals             | 16%        | 2%     | 25%        |
| Roots and Tubers    | 38%        | 7%     | 17%        |
| Oilseeds and Pulses | 15%        | 1%     | 4%         |
| Fruit & Veg         | 26%        | 10%    | 19%        |
| Meat                | 9%         | 4%     | 11%        |
| Fish/Seafood        | 15%        | 9%     | 11%        |
| Milk                | 9%         | 0.5%   | 7%         |
| Beverages, Other    | 16%        | 0.50%  | 7%         |

#### A4 Data Sources for Origin and LCI Data

Table S9: Percentage of Conventional vs. Organic in Each Food Category (see references)

| Product            | %<br>Conventional<br>vs Organic | Reference | Details/Report Number                 |
|--------------------|---------------------------------|-----------|---------------------------------------|
| Milk-ROW           | 93.6%                           |           |                                       |
| Milk-ROW ECO       | 6.4%                            | SCB 2013  | HA 24 SM 1301                         |
| Milk-Swedish       | 87.3%                           |           |                                       |
| Milk-Swedish ECO   | 12.7%                           | SCB, 2014 | Production of organic and non-organic |
| Sugarbeet-ROW      | 98.2%                           |           |                                       |
| Sugarbeet-ROW      | 1.8%                            | SCB 2013  | HA 24 SM 1301                         |
| Sugarbeet-Swedish  | 98.2%                           |           |                                       |
| Sugarbeet-Swedish  | 1.8%                            | SCB 2013  | HA 24 SM 1301                         |
| Wheat-ROW          | 97.5%                           |           |                                       |
| Wheat-ROW ECO      | 2.5%                            | SCB 2013  | HA 24 SM 1301                         |
| Wheat-Swedish      | 96.2%                           |           |                                       |
| Wheat-Swedish ECO  | 3.8%                            | SCB, 2014 | Production of organic and non-organic |
| Rye-ROW            | 97.5%                           |           |                                       |
| Rye-ROW ECO        | 2.5%                            | SCB 2013  | HA 24 SM 1301                         |
| Rye-Swedish        | 96.7%                           |           |                                       |
| Rye-Swedish ECO    | 3.3%                            | SCB, 2014 | Production of organic and non-organic |
| Barley-ROW         | 97.5%                           |           |                                       |
| Barley-ROW ECO     | 2.5%                            | SCB 2013  | HA 24 SM 1301                         |
| Barley-Swedish     | 97.7%                           |           |                                       |
| Barley-Swedish ECO | 2.3%                            | SCB, 2014 | Production of organic and non-organic |
| Oranges-ROW        | 94.7%                           |           |                                       |
| Oranges-ROW ECO    | 5.3%                            | SCB 2013  | HA 24 SM 1301                         |
| Oranges-Swedish    | 100.0%                          |           |                                       |
| Oranges-Swedish    | 0.0%                            |           | Not Swedish Product                   |
| Fruits Other-ROW   | 94.7%                           |           |                                       |
| Fruits Other-ROW   | 5.3%                            | SCB 2013  | HA 24 SM 1301                         |
| Fruits Other-      | 90.2%                           |           |                                       |

|                   |        |            |                                       |
|-------------------|--------|------------|---------------------------------------|
| Fruits Other-     | 9.8%   |            | Willer et al, 2015                    |
| Apples-ROW        | 94.7%  |            |                                       |
| Apples-ROW ECO    | 5.3%   | SCB 2013   | HA 24 SM 1301                         |
| Apples-Swedish    | 90.2%  |            |                                       |
| Apples-Swedish    | 9.8%   |            | Willer et al, 2015                    |
| Bananas-ROW       | 75.0%  |            |                                       |
| Bananas-ROW ECO   | 25.0%  | SCB, 2014b |                                       |
| Bananas-Swedish   | 100.0% |            |                                       |
| Bananas-Swedish   | 0.0%   |            | <i>Not Swedish Product</i>            |
| Vegetables Other- | 94.1%  |            |                                       |
| Vegetables Other- | 5.9%   | SCB 2013   | HA 24 SM 1301                         |
| Vegetables Other- | 93.8%  |            |                                       |
| Vegetables Other- | 6.2%   |            | Willer et al, 2015                    |
| Tomatoes-ROW      | 94.1%  |            |                                       |
| Tomatoes-ROW      | 5.9%   | SCB 2013   | HA 24 SM 1301                         |
| Tomatoes-Swedish  | 100.0% |            |                                       |
| Tomatoes-Swedish  | 6.2%   |            | Willer et al, 2015                    |
| Pig-ROW           | 98.6%  |            |                                       |
| Pig-ROW ECO       | 1.4%   | SCB 2013   | HA 24 SM 1301                         |
| Pig-Swedish       | 98.5%  |            |                                       |
| Pig-Swedish ECO   | 1.5%   | SCB, 2014  | Production of organic and non-organic |
| Bovine-ROW        | 98.6%  |            |                                       |
| Bovine-ROW ECO    | 1.4%   | SCB 2013   | HA 24 SM 1301                         |
| Bovine-Swedish    | 86.3%  |            |                                       |
| Bovine-Swedish    | 13.7%  | SCB, 2014  | Production of organic and non-organic |
| Poultry-ROW       | 100.0% |            |                                       |
| Poultry-ROW ECO   | 0.0%   |            | <i>Chose to keep this zero</i>        |
| Poultry-Swedish   | 99.7%  |            |                                       |
| Poultry-Swedish   | 0.3%   | SCB, 2014  | Production of organic and non-organic |
| Beer-ROW          | 99.0%  |            |                                       |
| Beer-ROW ECO      | 1.0%   |            | Systembolaget, 2014                   |
| Beer-Swedish      | 99.0%  |            |                                       |
| Beer-Swedish ECO  | 1.0%   |            | Systembolaget, 2014                   |
| Wine-ROW          | 94.8%  |            |                                       |
| Wine-ROW ECO      | 5.2%   |            | Systembolaget, 2014                   |
| Wine-Swedish      | 100.0% |            |                                       |
| Wine-Swedish ECO  | 0.0%   |            | <i>Not Swedish Product</i>            |
| Potatoes-ROW      | 94.1%  |            |                                       |
| Potatoes-ROW ECO  | 5.9%   |            |                                       |
| Potatoes-Swedish  | 98.0%  |            |                                       |
| Potatoes-Swedish  | 2.0%   | SCB, 2014  | Production of organic and non-organic |
| Sugar-ROW         | 98.2%  |            |                                       |
| Sugar-ROW ECO     | 1.8%   | SCB 2013   | HA 24 SM 1301                         |
| Sugar-Swedish     | 98.2%  |            |                                       |
| Sugar-Swedish ECO | 1.8%   | SCB 2013   | HA 24 SM 1301                         |
| Rapeseed-ROW      | 95.1%  |            |                                       |
| Rapeseed-ROW ECO  | 4.9%   | SCB 2013   | HA 24 SM 1301                         |
| Rapeseed-Swedish  | 98.7%  |            |                                       |
| Rapeseed-Swedish  | 1.3%   | SCB, 2014  | Production of organic and non-organic |
| Oilcrop Other-ROW | 95.1%  |            |                                       |
| Oilcrop Other-ROW | 4.9%   | SCB 2013   | HA 24 SM 1301                         |
| Oilcrop Other-    | 98.7%  |            |                                       |
| Oilcrop Other-    | 1.3%   |            | Assumed same as rapeseed              |
| Soyabeans-ROW     | 94.1%  |            |                                       |
| Soyabeans-ROW     | 5.9%   | SCB 2013   | HA 24 SM 1301                         |
| Soyabeans-Swedish | 94.1%  |            |                                       |
| Soyabeans-Swedish | 5.9%   | SCB 2013   | HA 24 SM 1301                         |
| Crustaceans-ROW   | 91.9%  |            |                                       |
| Crustaceans-ROW   | 8.1%   | SCB 2013   | HA 24 SM 1301                         |
| Crustaceans-      | 91.9%  |            |                                       |
| Crustaceans-      | 8.1%   | SCB 2013   | HA 24 SM 1301                         |



|                    |        |                                        |                                       |
|--------------------|--------|----------------------------------------|---------------------------------------|
| Freshwater-ROW     | 91.9%  |                                        |                                       |
| Freshwater-ROW     | 8.1%   | SCB 2013                               | HA 24 SM 1301                         |
| Freshwater-Swedish | 83.0%  |                                        |                                       |
| Freshwater-Swedish | 17.0%  | SCB, 2014b                             |                                       |
| Demersal-ROW       | 91.9%  |                                        |                                       |
| Demersal-ROW ECO   | 8.1%   | SCB 2013                               | HA 24 SM 1301                         |
| Demersal-Swedish   | 83.0%  |                                        |                                       |
| Demersal-Swedish   | 17.0%  | SCB, 2014b                             |                                       |
| Pelagic-ROW        | 91.9%  |                                        |                                       |
| Pelagic-ROW ECO    | 8.1%   | SCB 2013                               | HA 24 SM 1301                         |
| Pelagic-Swedish    | 83.0%  |                                        |                                       |
| Pelagic-Swedish    | 17.0%  | SCB, 2014b                             |                                       |
| Cream-ROW          | 93.6%  |                                        |                                       |
| Cream-ROW ECO      | 6.4%   | SCB 2013                               | HA 24 SM 1301                         |
| Cream-Swedish      | 93.6%  |                                        |                                       |
| Cream-Swedish      | 6.4%   | SCB 2013                               | HA 24 SM 1301                         |
| Butter-ROW         | 95.1%  |                                        |                                       |
| Butter-ROW ECO     | 4.9%   | SCB 2013                               | HA 24 SM 1301                         |
| Butter-Swedish     | 95.1%  |                                        |                                       |
| Butter-Swedish ECO | 4.9%   | SCB 2013                               | HA 24 SM 1301                         |
| Palm Oil-ROW       | 100.0% |                                        |                                       |
| Palm Oil-ROW ECO   | 0.0%   | Chose not to classify this as ECO..... |                                       |
| Palm Oil-Swedish   | 100.0% |                                        |                                       |
| Palm Oil-Swedish   | 0.0%   | <i>Not Swedish Product</i>             |                                       |
| Rapeseed Oil-ROW   | 95.1%  |                                        |                                       |
| Rapeseed Oil-ROW   | 4.9%   | SCB 2013                               | HA 24 SM 1301                         |
| Rapeseed Oil-      | 98.7%  |                                        |                                       |
| Rapeseed Oil-      | 1.3%   | SCB, 2014                              | Production of organic and non-organic |
| Sunflower Oil-ROW  | 95.1%  |                                        |                                       |
| Sunflower Oil-ROW  | 4.9%   | SCB 2013                               | HA 24 SM 1301                         |
| Sunflower Oil-     | 100.0% |                                        |                                       |
| Sunflower Oil-     | 0.0%   | <i>Not Swedish Product</i>             |                                       |
| Coffee-ROW         | 92.8%  |                                        |                                       |
| Coffee-ROW ECO     | 7.2%   | SCB 2013                               | HA 24 SM 1301                         |
| Coffee-Swedish     | 100.0% |                                        |                                       |
| Coffee-Swedish ECO | 0.0%   | <i>Not Swedish Product</i>             |                                       |
| Cocoa-ROW          | 98.2%  |                                        |                                       |
| Cocoa-ROW ECO      | 1.8%   | SCB 2013                               | HA 24 SM 1301                         |
| Cocoa-Swedish      | 100.0% |                                        |                                       |
| Cocoa-Swedish ECO  | 0.0%   | <i>Not Swedish Product</i>             |                                       |
| Eggs-ROW           | 93.6%  |                                        |                                       |
| Eggs-ROW ECO       | 6.4%   | SCB 2013                               | HA 24 SM 1301                         |
| Eggs-Swedish       | 90.4%  |                                        |                                       |
| Eggs-Swedish ECO   | 9.6%   | SCB, 2014                              | Production of organic and non-organic |
| Nuts-ROW           | 94.7%  |                                        |                                       |
| Nuts-ROW ECO       | 5.3%   | SCB 2013                               | HA 24 SM 1301                         |
| Nuts-Swedish       | 94.7%  |                                        |                                       |
| Nuts-Swedish ECO   | 5.3%   | SCB 2013                               | HA 24 SM 1301                         |
| Peas-ROW           | 94.1%  |                                        |                                       |
| Peas-ROW ECO       | 5.9%   | SCB 2013                               | HA 24 SM 1301                         |
| Peas-Swedish       | 90.3%  |                                        |                                       |
| Peas-Swedish ECO   | 9.7%   | SCB, 2014                              | Production of organic and non-organic |
| Beans-ROW          | 94.1%  |                                        |                                       |
| Beans-ROW ECO      | 5.9%   | SCB 2013                               | HA 24 SM 1301                         |
| Beans-Swedish      | 94.1%  |                                        |                                       |
| Beans-Swedish ECO  | 5.9%   | SCB 2013                               | HA 24 SM 1301                         |
| Spices Other-ROW   | 94.1%  |                                        |                                       |
| Spices Other-ROW   | 5.9%   | SCB 2013                               | HA 24 SM 1301                         |
| Spices Other-      | 94.1%  |                                        |                                       |
| Spices Other-      | 5.9%   | SCB 2013                               | HA 24 SM 1301                         |
| Pepper-ROW         | 94.1%  |                                        |                                       |

---

|                    |        |            |                            |
|--------------------|--------|------------|----------------------------|
| Pepper-ROW ECO     | 5.9%   | SCB 2013   | HA 24 SM 1301              |
| Pepper-Swedish     | 100.0% |            |                            |
| Pepper-Swedish     | 0.0%   |            | <i>Not Swedish Product</i> |
| Pimento-ROW        | 94.1%  |            |                            |
| Pimento-ROW ECO    | 5.9%   | SCB 2013   | HA 24 SM 1301              |
| Pimento-Swedish    | 100.0% |            |                            |
| Pimento-Swedish    | 0.0%   |            | <i>Not Swedish Product</i> |
| Offals-ROW         | 98.6%  |            |                            |
| Offals-ROW ECO     | 1.4%   | SCB 2013   | HA 24 SM 1301              |
| Offals-Swedish     | 98.6%  |            |                            |
| Offals-Swedish ECO | 1.4%   | SCB 2013   | HA 24 SM 1301              |
| InfantFood-ROW     | 60.0%  |            |                            |
| InfantFood-ROW     | 40.0%  | SCB, 2014b |                            |
| InfantFood-Swedish | 60.0%  |            |                            |
| InfantFood-Swedish | 40.0%  | SCB, 2014b |                            |
| ECO                |        |            |                            |

---

## A5 LCI Data

Table S10: LCI data references and assumptions

| Product               | Reference                  | Data Set<br>Modelled System     | Note                                | Data Set<br>Coverage |
|-----------------------|----------------------------|---------------------------------|-------------------------------------|----------------------|
| Milk-ROW              | Guerci et al., 2013        | Milk                            | modeled in kg                       | C-T-F                |
| Milk-Swedish          | Cederberg and Flysjö, 2004 | Milk-Swedeish                   | modeled in kg                       | C-T-F                |
| Milk-ROW ECO          | Guerci et al., 2013        | Milk-Organic                    | modeled in kg                       | C-T-F                |
| Milk-Swedish ECO      | Cederberg and Flysjö, 2004 | Milk-Swedish Organic            | modeled in kg                       | C-T-F                |
| Sugarbeet-ROW         | Agribalyse                 | Sugarbeet, Conventional         | no data available for organic       | C-T-F                |
| Sugarbeet-Swedish     |                            |                                 |                                     |                      |
| Sugarbeet-ROW ECO     |                            |                                 |                                     |                      |
| Sugarbeet-Swedish ECO |                            |                                 |                                     |                      |
| Wheat-ROW             | Ecoinvent                  | market for wheat grain          |                                     | C-T-F                |
| Wheat-Swedish         | Ecoinvent                  | market for wheat grain, CH      |                                     | C-T-F                |
| Wheat-ROW ECO         | Ecoinvent                  | market for wheat grain, organic | assumed same for Sweden and imports | C-T-G                |
| Wheat-Swedish ECO     |                            |                                 |                                     |                      |
| Rye-ROW               | Ecoinvent                  | market for rye                  | assumed same for Sweden and imports | C-T-G                |
| Rye-Swedish           |                            |                                 |                                     |                      |
| Rye-ROW ECO           | Ecoinvent                  | market for rye, organic         | assumed same for Sweden and imports | C-T-G                |
| Rye-Swedish ECO       |                            |                                 |                                     |                      |
| Barley-ROW            | Ecoinvent                  | market for barley               | assumed same for Sweden and imports | C-T-G                |
| Barley-Swedish        |                            |                                 |                                     |                      |
| Barley-ROW ECO        | Ecoinvent                  | market for barley, organic      | assumed same for Sweden and imports | C-T-G                |
| Barley-Swedish ECO    |                            |                                 |                                     |                      |
| Oranges-ROW           | Agribalyse                 | Peach, conventional             | modeled as peach                    | C-T-F                |
| Oranges-Swedish ECO   | -                          | -                               |                                     | -                    |

|                              |                            |                              |                                     |       |
|------------------------------|----------------------------|------------------------------|-------------------------------------|-------|
| Oranges-ROW ECO              | Agribalyse                 | Peach, organic               | modeled as peach                    | C-T-F |
| Oranges-Swedish ECO          | -                          | -                            |                                     | -     |
| Fruits_Other-ROW             | Agribalyse                 | Peach, conventional          | modeled as peach                    | C-T-F |
| Fruits_Other-Swedish         |                            |                              |                                     |       |
| Fruits_Other-ROW ECO         | Agribalyse                 | Peach, organic               | modeled as peach                    | C-T-F |
| Fruits_Other-Swedish ECO     |                            |                              |                                     |       |
| Apples-ROW                   | Agribalyse                 | Apple, Conventional          | assumed same for Sweden and imports | C-T-F |
| Apples-Swedish               |                            |                              |                                     |       |
| Apples-ROW ECO               | Agribalyse                 | Apple, Organic               | assumed same for Sweden and imports | C-T-F |
| Apples-Swedish ECO           |                            |                              |                                     |       |
| Bananas-ROW                  | Ecoinvent                  | Market for banana            |                                     | C-T-G |
| Bananas-Swedish              | -                          | -                            |                                     | -     |
| Bananas-ROW ECO              | Ecoinvent                  | Market for banana            | no data available for organic       | C-T-G |
| Bananas-Swedish ECO          | -                          | -                            |                                     | -     |
| Vegetables_Other-ROW         | Agribalyse                 | Carrot, Conventional         | modeled as carrot                   | C-T-F |
| Vegetables_Other-Swedish     |                            |                              |                                     |       |
| Vegetables_Other-ROW ECO     | Agribalyse                 | Carrot, Organic              | modeled as carrot                   | C-T-F |
| Vegetables_Other-Swedish ECO |                            |                              |                                     |       |
| Tomatoes-ROW                 | Agribalyse                 | Tomato, Conventional         | assumed same for Sweden and imports | C-T-F |
| Tomatoes-Swedish             |                            |                              |                                     |       |
| Tomatoes-ROW ECO             | Agribalyse                 | Tomato, Organic (Greenhouse) | assumed same for Sweden and imports | C-T-F |
| Tomatoes-Swedish ECO         |                            |                              |                                     |       |
| Pig-ROW                      | Williams et al., 2006      |                              |                                     | C-T-F |
| Pig-Swedish                  | Cederberg and Flysjö, 2004 |                              |                                     | C-T-F |
| Pig-ROW ECO                  | Williams et al., 2006      |                              |                                     | C-T-F |
| Pig-Swedish ECO              | Carlsson, B. et al 2009    |                              |                                     | C-T-F |

|                      |                        |                                   |                                     |       |
|----------------------|------------------------|-----------------------------------|-------------------------------------|-------|
| Bovine-ROW           | Williams et al., 2010  |                                   | 70% DW to meat                      | C-T-F |
| Bovine-Swedish       | Jordbruksverket, 2012  |                                   |                                     | C-T-F |
| Bovine-ROW ECO       | Williams et al., 2010  |                                   | 70% DW to meat                      | C-T-F |
| Bovine-Swedish ECO   | Cederberg et al., 2009 |                                   |                                     | C-T-G |
| Poultry-ROW          | Williams, 2006         |                                   |                                     | C-T-F |
| Poultry-Swedish      | Cederberg et al., 2009 |                                   |                                     | C-T-F |
| Poultry-ROW ECO      | Williams, 2006         |                                   |                                     | C-T-F |
| Poultry-Swedish ECO  | Cederberg et al., 2009 |                                   |                                     | C-T-F |
| Beer-ROW             | EPD, 2014              | Beer                              | no organic available                | C-T-G |
| Beer-Swedish         |                        |                                   |                                     |       |
| Beer-ROW ECO         |                        |                                   |                                     |       |
| Beer-Swedish ECO     |                        |                                   |                                     |       |
| Wine-ROW             | EPD, 2015              | Red Wine                          |                                     | C-T-G |
| Wine-Swedish         | -                      | -                                 |                                     | -     |
| Wine-ROW ECO         | EPD, 2013              | Organic Red Wine                  |                                     | C-T-G |
| Wine-Swedish ECO     | -                      | -                                 |                                     | -     |
| Potatoes-ROW         | Ecoinvent              | Market for potato                 | assumed same for Sweden and imports | C-T-G |
| Potatoes-Swedish     |                        |                                   |                                     |       |
| Potatoes-ROW ECO     | Ecoinvent              | Market for potato, organic        | assumed same for Sweden and imports | C-T-G |
| Potatoes-Swedish ECO |                        |                                   |                                     |       |
| Sugar-ROW            | Ecoinvent              | Market for sugar, Sugarcane       |                                     | C-T-G |
| Sugar-Swedish        | Ecoinvent              | market for sugar, from sugar beet |                                     | C-T-G |
| Sugar-ROW ECO        | Ecoinvent              | Market for sugar, Sugarcane       | no organic available                | C-T-G |

|                           |                   |                                   |                                     |       |
|---------------------------|-------------------|-----------------------------------|-------------------------------------|-------|
| Sugar-Swedish ECO         | Ecoinvent         | market for sugar, from sugar beet | no organic available                | C-T-G |
| Rapeseed-ROW              | Ecoinvent         | market for rapeseed               | assumed same for Sweden and imports | C-T-G |
| Rapeseed-Swedish          |                   |                                   |                                     |       |
| Rapeseed-ROW ECO          | Ecoinvent         | market for rapeseed, organic      | assumed same for Sweden and imports | C-T-G |
| Rapeseed-Swedish ECO      |                   |                                   |                                     |       |
| Oilcrop_Other-ROW         | Ecoinvent         | market for rapeseed               | assumed same for Sweden and imports | C-T-G |
| Oilcrop_Other-Swedish     |                   |                                   |                                     |       |
| Oilcrop_Other-ROW ECO     | Ecoinvent         | market for rapeseed, organic      | assumed same for Sweden and imports | C-T-G |
| Oilcrop_Other-Swedish ECO |                   |                                   |                                     |       |
| Soyabeans-ROW             | Ecoinvent         | market for soy                    |                                     | C-T-G |
| Soyabeans-Swedish         | -                 | -                                 |                                     | -     |
| Soyabeans-ROW ECO         | Ecoinvent         | market for soy, organic           |                                     | C-T-G |
| Soyabeans-Swedish ECO     | -                 | -                                 |                                     | -     |
| Crustaceans-ROW           | Ecoinvent         | Wild cod                          | Modeled as cod                      | C-T-G |
| Crustaceans-Swedish       |                   |                                   |                                     |       |
| Crustaceans-ROW ECO       |                   |                                   |                                     |       |
| Crustaceans-Swedish ECO   |                   |                                   |                                     |       |
| Freshwater-ROW            | Agribalyse        | Large trout                       |                                     | C-T-F |
| Freshwater-Swedish        |                   |                                   |                                     |       |
| Freshwater-ROW ECO        | Agribalyse        | Large trout                       |                                     | C-T-F |
| Freshwater-Swedish ECO    |                   |                                   |                                     |       |
| Demersal-ROW              | LCA Food Database | Wild cod                          |                                     | C-T-F |
| Demersal-Swedish          |                   |                                   |                                     |       |
| Demersal-ROW ECO          | LCA Food Database | Wild cod                          |                                     | C-T-F |
| Demersal-Swedish ECO      |                   |                                   |                                     |       |
| Pelagic-ROW               | LCA Food Database | Herring                           |                                     | C-T-F |

|                           |                   |                                                    |                                                 |       |
|---------------------------|-------------------|----------------------------------------------------|-------------------------------------------------|-------|
| Pelagic-Swedish           |                   |                                                    |                                                 |       |
| Pelagic-ROW ECO           | LCA Food Database | Herring                                            |                                                 | C-T-F |
| Pelagic-Swedish ECO       |                   |                                                    |                                                 |       |
| Cream-ROW                 | Ecoinvent         | market for cream                                   |                                                 | C-T-G |
| Cream-Swedish             |                   |                                                    |                                                 |       |
| Cream-ROW ECO             |                   |                                                    |                                                 |       |
| Cream-Swedish ECO         |                   |                                                    |                                                 |       |
| Butter-ROW                | Ecoinvent         | market for butter                                  | no data available for organic or Swedish butter | C-T-G |
| Butter-Swedish            |                   |                                                    |                                                 |       |
| Butter-ROW ECO            |                   |                                                    |                                                 |       |
| Butter-Swedish ECO        |                   |                                                    |                                                 |       |
| Palm Oil-ROW              | Ecoinvent         | market for palm oil                                |                                                 | C-T-G |
| Palm Oil-Swedish          | -                 | -                                                  |                                                 | -     |
| Palm Oil-ROW ECO          | Ecoinvent         | market for palm oil (assumed same as conventional) |                                                 | C-T-G |
| Palm Oil-Swedish ECO      | -                 | -                                                  |                                                 | -     |
| Rapseed Oil-ROW           | Ecoinvent         | market for rape oil, ROW                           |                                                 | C-T-G |
| Rapseed Oil-Swedish       | Ecoinvent         | market for rape oil, CH                            |                                                 | C-T-G |
| Rapseed Oil-ROW ECO       | Ecoinvent         | market for rape oil, ROW                           |                                                 | C-T-G |
| Rapseed Oil-Swedish ECO   | Ecoinvent         | market for rape oil, CH                            |                                                 | C-T-G |
| Sunflower Oil-ROW         | Ecoinvent         | market for rape oil, ROW                           |                                                 | C-T-G |
| Sunflower Oil-Swedish     | Ecoinvent         | market for rape oil, CH                            |                                                 | C-T-G |
| Sunflower Oil-ROW ECO     | Ecoinvent         | market for rape oil, ROW                           |                                                 | C-T-G |
| Sunflower Oil-Swedish ECO | Ecoinvent         | market for rape oil, CH                            |                                                 | C-T-G |

|                    |                            |                                                       |                                     |       |
|--------------------|----------------------------|-------------------------------------------------------|-------------------------------------|-------|
| Coffee-ROW         | Agribalyse                 | Coffee bean (Robusta), depulped, Brazil, at farm gate |                                     | C-T-F |
| Coffee-Swedish     | -                          | -                                                     | -                                   | -     |
| Coffee-ROW ECO     | Agribalyse                 | Coffee bean (Robusta), depulped, Brazil, at farm gate | no data available for organic       | C-T-F |
| Coffee-Swedish ECO | -                          | -                                                     | -                                   | -     |
| Cocoa-ROW          | Agribalyse                 | Cocoa, conventional, Cabruca, at orchard              |                                     | C-T-F |
| Cocoa-Swedish      | -                          | -                                                     | -                                   | -     |
| Cocoa-ROW ECO      | Agribalyse                 | Cocoa, conventional, Cabruca, at orchard              | no data available for organic       | C-T-F |
| Cocoa-Swedish ECO  | -                          | -                                                     | -                                   | -     |
| Eggs-ROW           | Leinonen et al., 2012      | Eggs, conventional                                    |                                     | C-T-F |
| Eggs-Swedish       | Sonnesson et al.           | Swedish Eggs                                          |                                     | C-T-F |
| Eggs-ROW ECO       | Leinonen et al. 2012       | Eggs, Organic                                         |                                     | C-T-F |
| Eggs-Swedish ECO   | Carlsson et al. 2009       | Swedish Organic Eggs                                  |                                     | C-T-G |
| Nuts-ROW           | de Figueirêdo et al., 2014 | Cashew                                                |                                     | C-T-F |
| Nuts-Swedish       | -                          | -                                                     | -                                   | -     |
| Nuts-ROW ECO       | de Figueirêdo et al., 2014 | Cashew                                                | no data for organic available       | C-T-F |
| Nuts-Swedish ECO   | -                          | -                                                     | -                                   | -     |
| Peas-ROW           | Agribalyse                 | peas, conventional                                    | assumed same for Sweden and imports | C-T-F |
| Peas-Swedish       |                            |                                                       |                                     |       |
| Peas-ROW ECO       | Agribalyse                 | peas, organic                                         | assumed same for Sweden and imports | C-T-F |
| Peas-Swedish ECO   |                            |                                                       |                                     |       |



|                          |                 |                               |                                        |       |
|--------------------------|-----------------|-------------------------------|----------------------------------------|-------|
| Beans-ROW                | Ecoinvent       | market for fava bean          |                                        | C-T-F |
| Beans-Swedish            | Hallström, 2015 |                               |                                        | C-T-F |
| Beans-ROW ECO            | Ecoinvent       | market for fava bean, organic |                                        | C-T-F |
| Beans-Swedish ECO        | Ecoinvent       | market for fava bean, organic |                                        | C-T-F |
| Spices_Other-ROW         | Ecoinvent       | Market for bell pepper        | Assumed peper, pimento and spices same | C-T-G |
| Spices_Other-Swedish     |                 |                               |                                        |       |
| Spices_Other-ROW ECO     |                 |                               |                                        |       |
| Spices_Other-Swedish ECO |                 |                               |                                        |       |
| Pepper-ROW               |                 |                               |                                        |       |
| Pepper-Swedish           |                 |                               |                                        |       |
| Pepper-ROW ECO           |                 |                               |                                        |       |
| Pepper-Swedish ECO       |                 |                               |                                        |       |
| Pimento-ROW              |                 |                               |                                        |       |
| Pimento-Swedish          |                 |                               |                                        |       |
| Pimento-ROW ECO          |                 |                               |                                        |       |
| Pimento-Swedish ECO      |                 |                               |                                        |       |
| Offals-ROW               | Ecoinvent       | Market for beef               | (Assumed ¼ of impact from beef)        | C-T-G |
| Offals-Swedish           |                 |                               |                                        |       |
| Offals-ROW ECO           |                 |                               |                                        |       |
| Offals-Swedish ECO       |                 |                               |                                        |       |
| InfantFood-ROW           | Agribalyse      | Apple, Conventional           | modeled as apple                       | C-T-F |
| InfantFood-Swedish       |                 |                               |                                        |       |
| InfantFood-ROW ECO       | Agribalyse      | Apple, Organic                | modeled as apple, organic              | C-T-F |
| InfantFood-Swedish ECO   |                 |                               |                                        |       |

## Nutritional Values

Nutritional values and protein content per kg were provided from the Swedish National Food Agency, (Livsmedelsverket, 2015).

Table S11: Nutritional values per kg food

| Food             | kCal/kg | Protein/kg |
|------------------|---------|------------|
| Milk             | 599.0   | 35.1       |
| Sugarbeet        | 506.0   | 11.9       |
| Wheat            | 3 521.0 | 4.0        |
| Rye              | 3 521.0 | 84.7       |
| Barley           | 3 413.0 | 92.0       |
| Oranges          | 494.0   | 8.0        |
| Fruits_Other     | 539.0   | 3.7        |
| Apples           | 479.0   | -          |
| Bananas          | 1 011.0 | 10.0       |
| Vegetables_Other | 185.0   | 5.0        |
| Tomatoes         | 175.0   | 8.1        |
| Pig              | 1 546.7 | 191.9      |
| Bovine           | 1 288.0 | 222.2      |
| Poultry          | 1 484.0 | 215.0      |
| Beer             | 342.0   | 2.5        |
| Wine             | 773.0   | 176.3      |
| Potatoes         | 786.0   | 17.4       |
| Sugar            | 4 047.0 | -          |
| Rapeseed         | 8 843.0 | -          |
| Oilcrop_Other    | 8 843.0 | -          |
| SoyaBeans        | 1 304.0 | 108.7      |
| Crustaceans      | 773.0   | 176.3      |
| Freshwater       | 1 775.2 | 204.6      |
| Demersal         | 1 775.2 | 204.6      |
| Pelagic          | 1 775.2 | 204.6      |
| Cream            | 3 745.0 | 21.0       |
| Butter           | 7 288.0 | 4.0        |
| Palm Oil         | 8 843.0 | -          |
| Rapseed Oil      | 8 843.0 | -          |
| Sunflower Oil    | 8 843.0 | -          |
| Coffee           | 20.0    | 1.0        |
| Cocoa            | 5 768.0 | 100.0      |
| Eggs             | 1 414.0 | 123.8      |
| Nuts             | 5 901.0 | 153.0      |
| Peas             | 717.0   | 54.0       |
| Beans            | 1 304.0 | 108.7      |
| Spices_Other     | 185.0   | 5.0        |
| Pepper           | 185.0   | 5.0        |
| Pimento          | 185.0   | 5.0        |
| Offals           | 1 194.0 | 194.0      |
| InfantFood       | 656.0   | 24.0       |

## A3 Results and Analysis

Contribution of Different Food Categories to Impact Categories

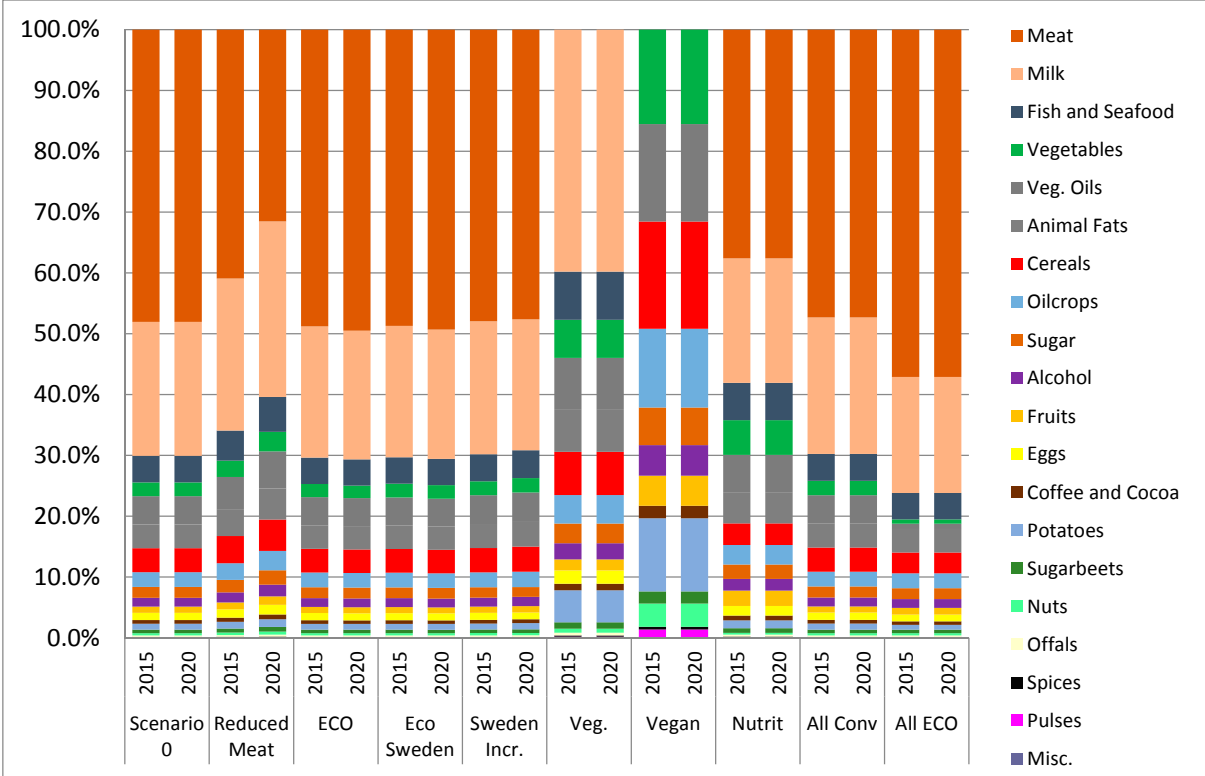

Figure S1: GHG emissions for different foods in 2015 and 2020.

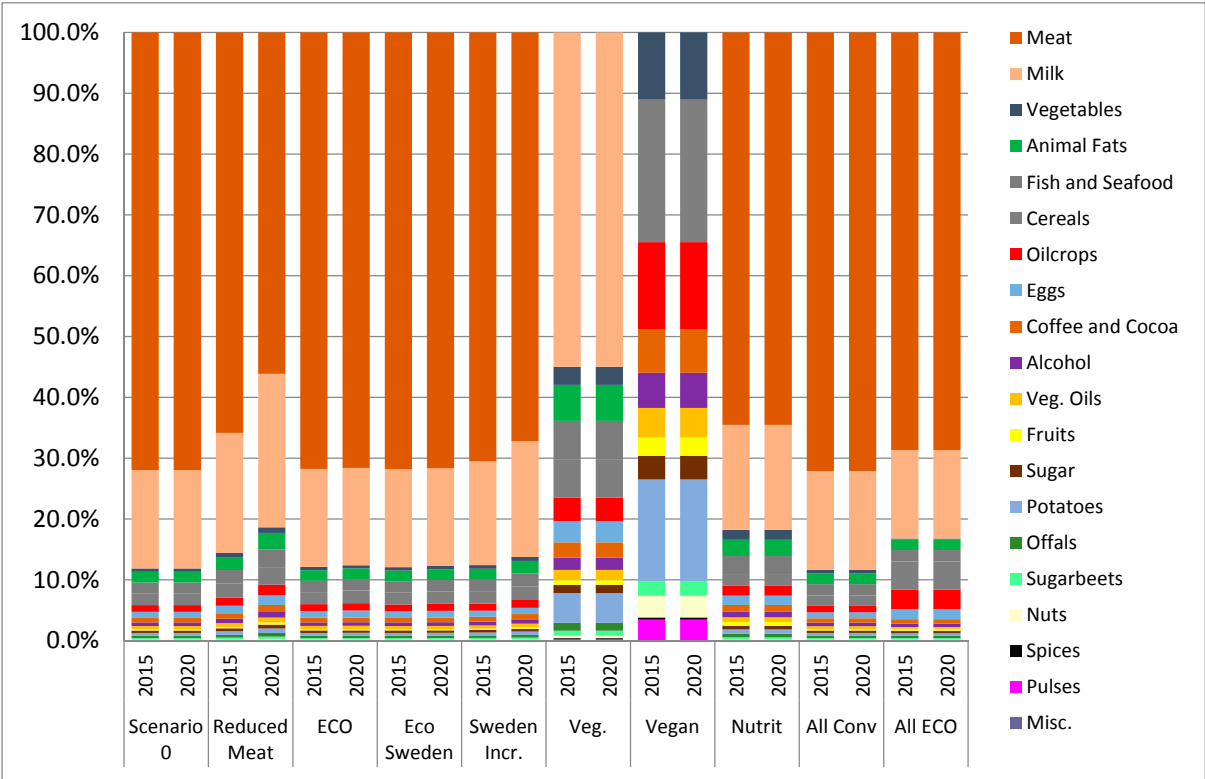

Figure S2: AP Contribution for different foods in 2015 and 2020

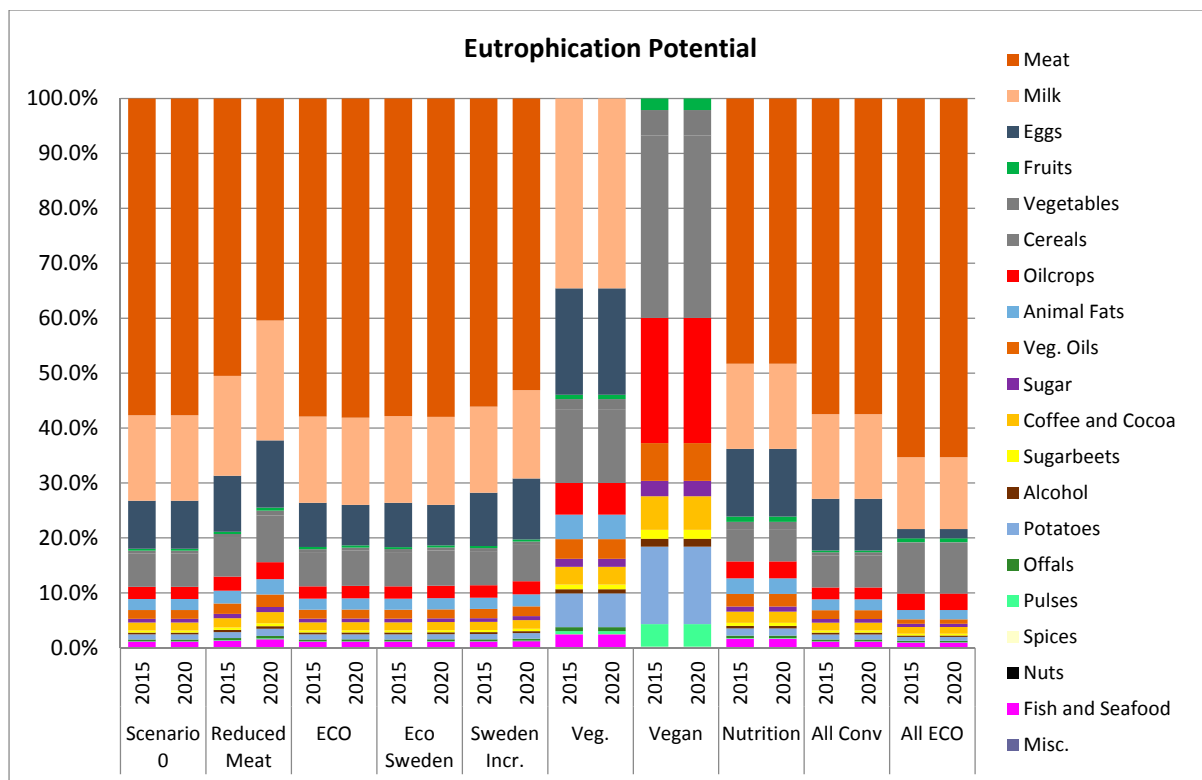

Figure S3: EP contribution for different foods in 2015 and 2020

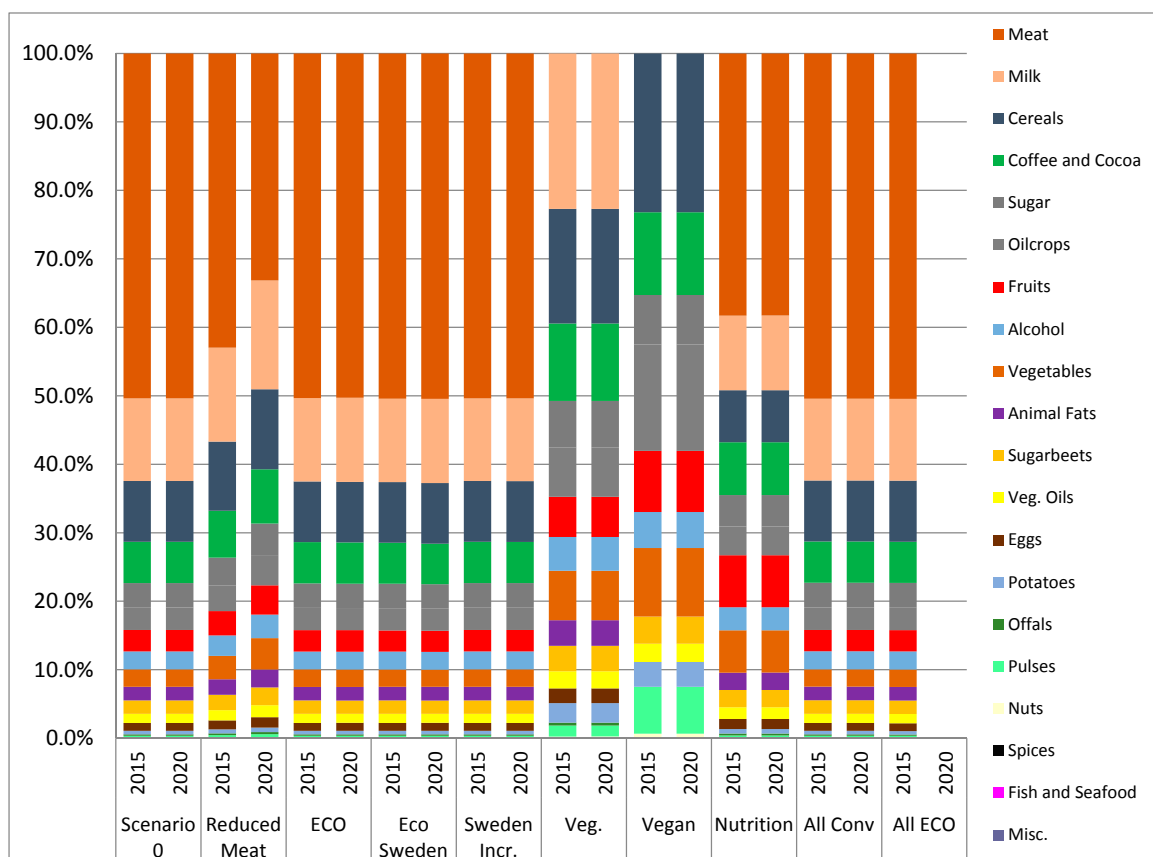

Figure S4: Land Use contribution for different foods in 2015 and 2020

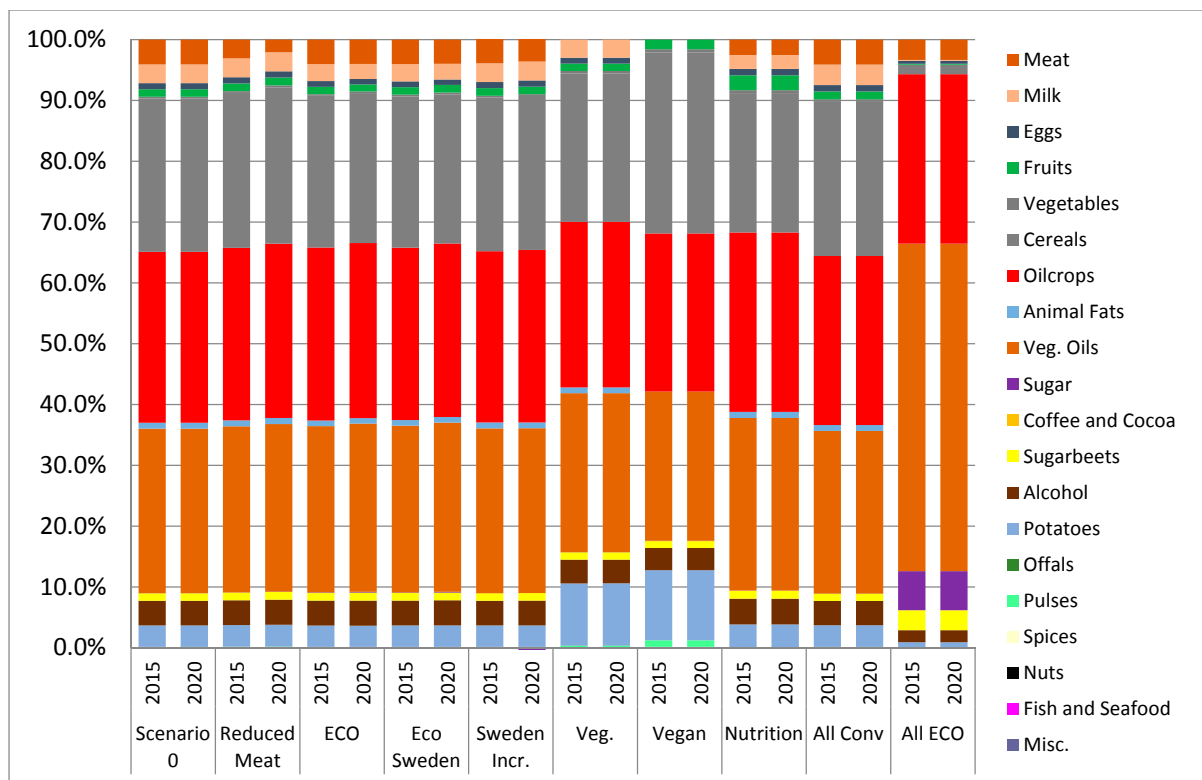

Figure S5: TETP Contribution for different foods in 2015 and 2020

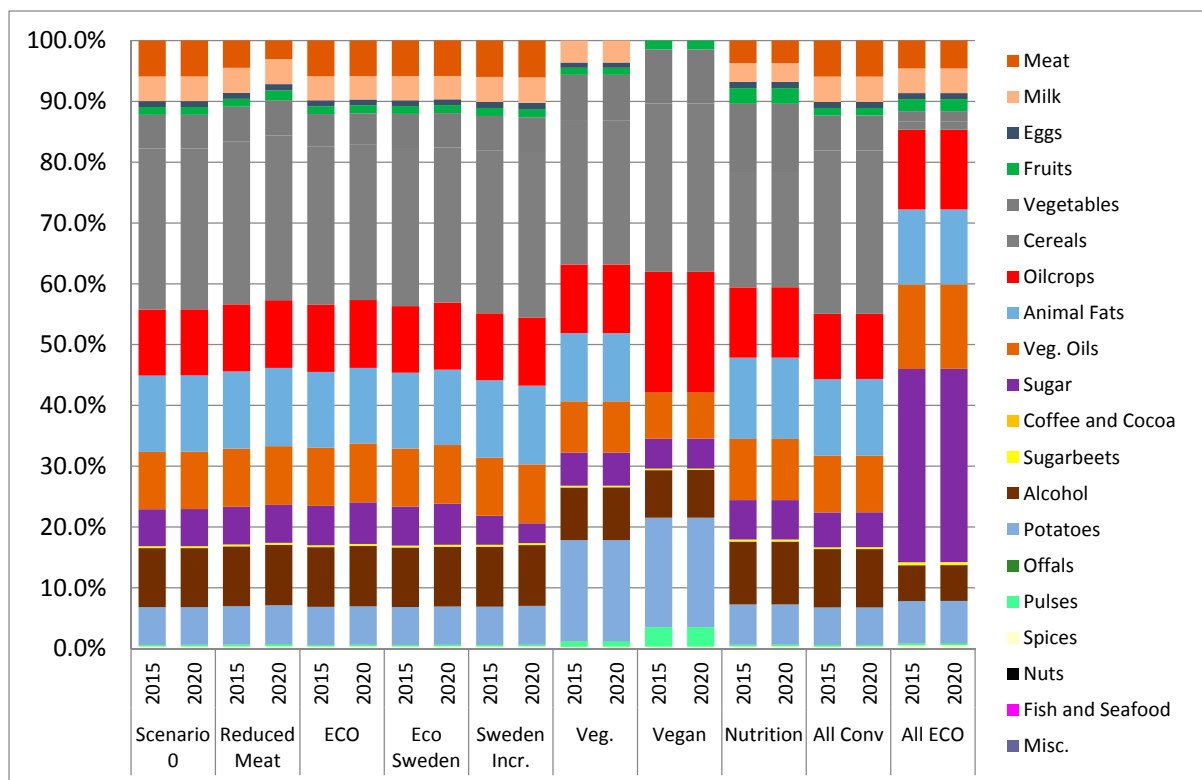

Figure S6: HTP contribution for different foods in 2015 and 2020

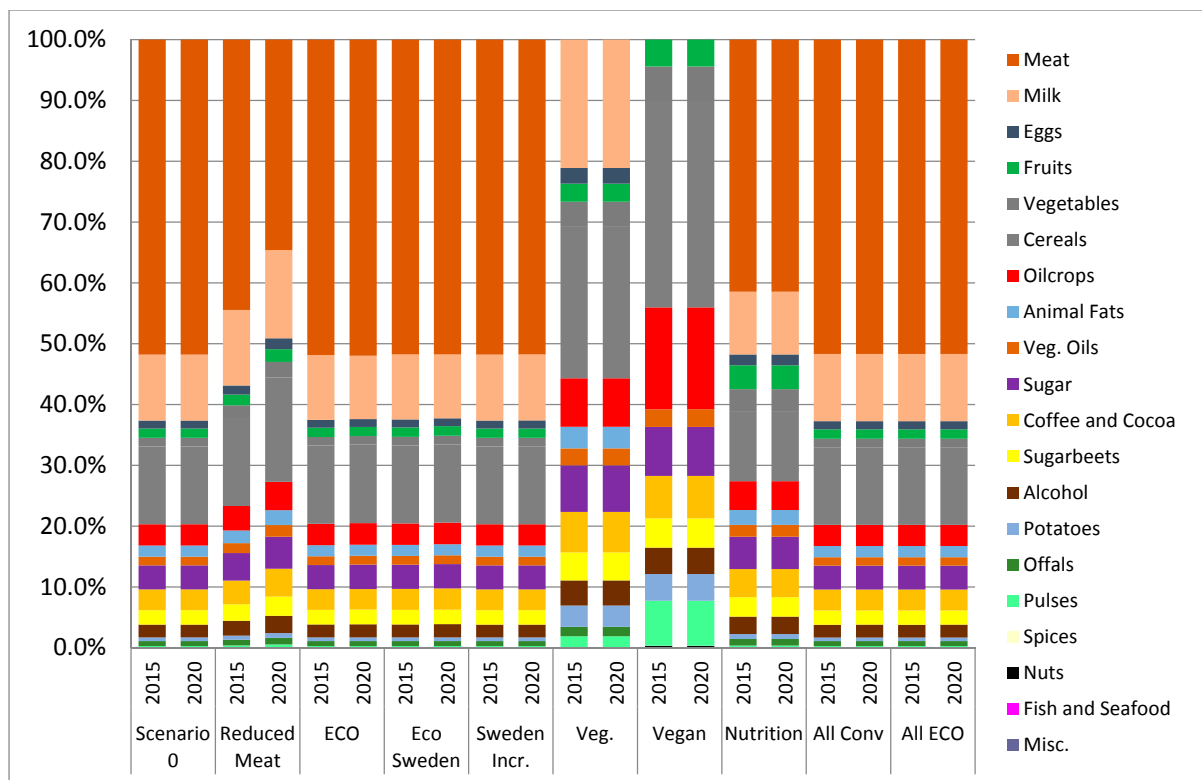

Figure S7: BDD contribution for different foods in 2015 and 2020

### Location of Created Impacts

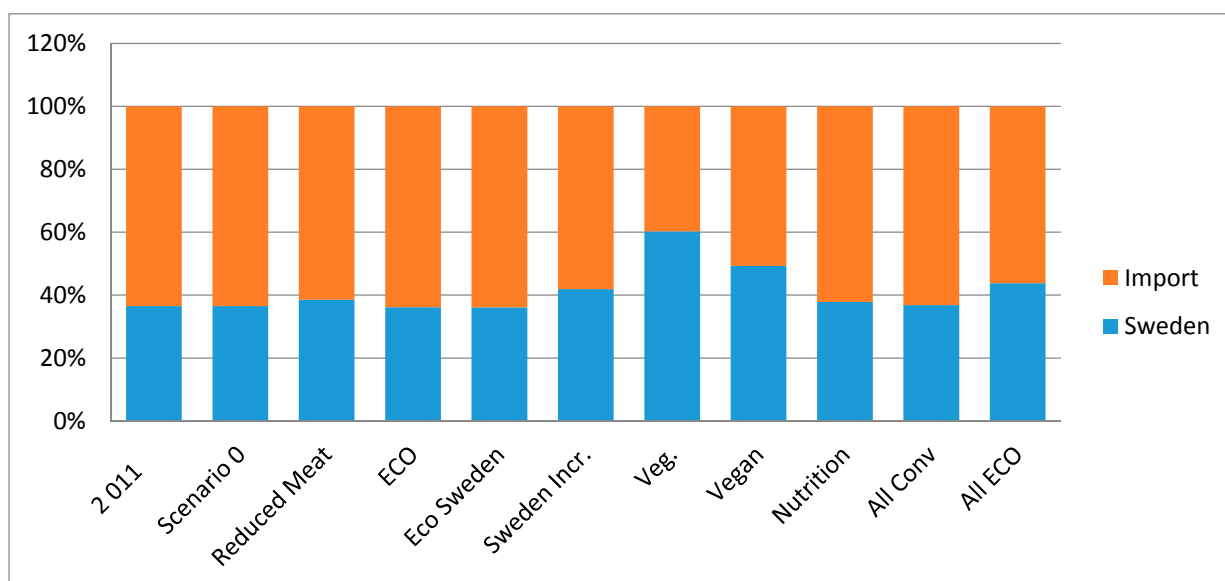

Figure S8: AP Contribution from Foods Produced in Sweden and Imports

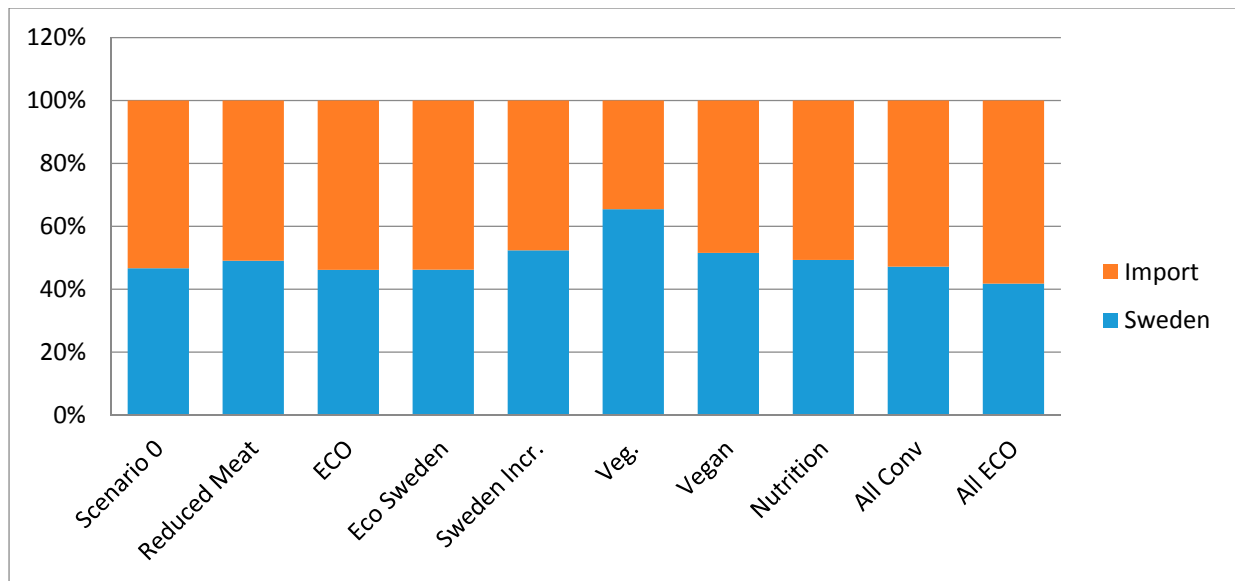

Figure S9: EP Contribution from Foods Produced in Sweden and Imports

## Scenario Comparisons across Impact Categories

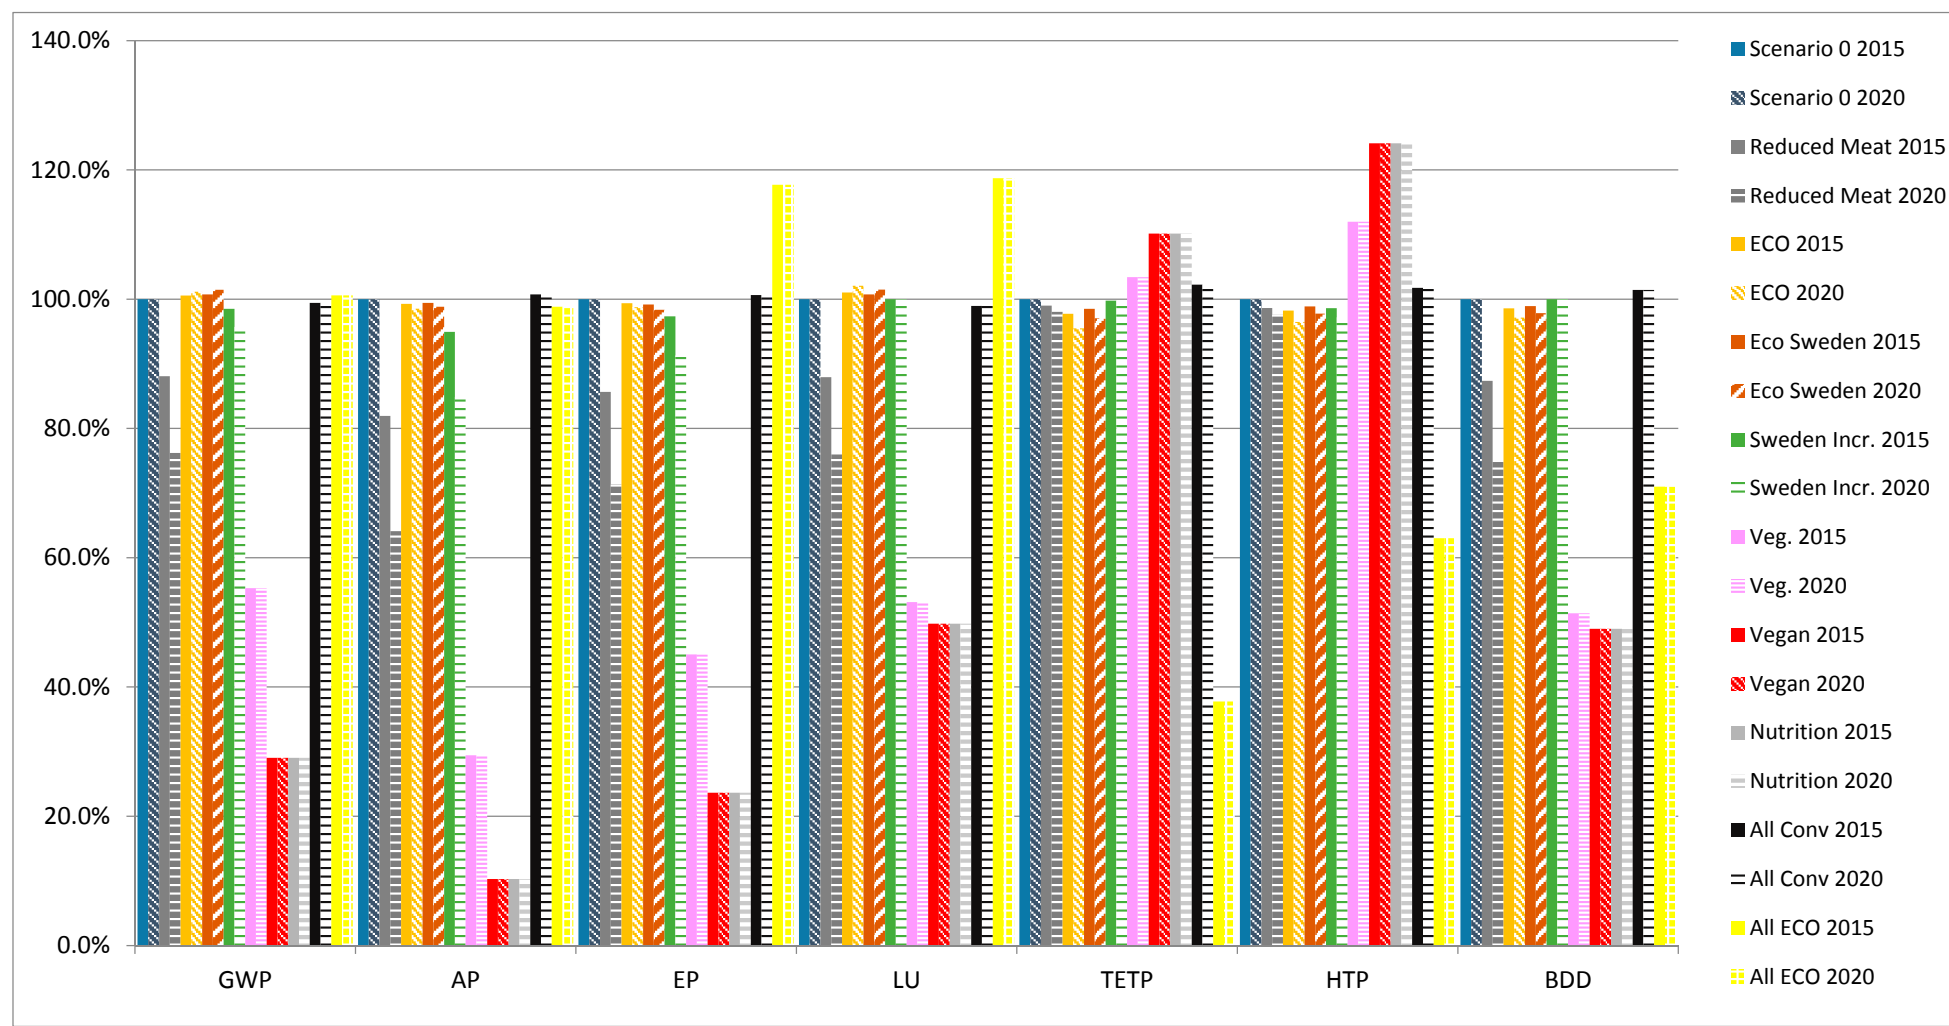

Figure S10: Comparing tradeoffs with impact categories for scenarios tested in 2015 and 2020



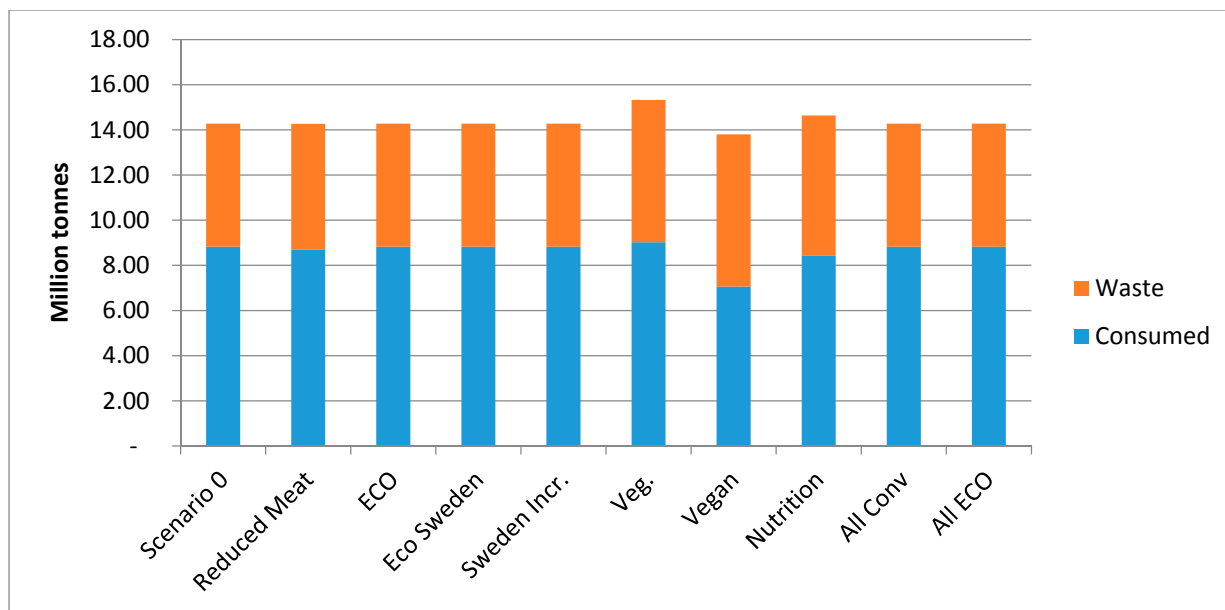

Figure S11: Food consumed and waste in 2015 for different scenarios

## References

- Agribalyse, 2015. AGRIBALYSE®, the French LCI Database for agricultural products: High quality data for producers and environmental labelling..
- Bernesson, S.; Nilsson, D.; Hansson, P.A. A limited LCA comparing large- and small-scale production of ethanol for heavy engines under Swedish conditions. *Biomass and Bioenergy* **2006**, *30*, 46-57.
- Cederberg, C., Flysjö, A., 2004. Life cycle inventory of 23 dairy farms in southwestern Sweden. Swed. Inst. Food Biotechnol. 59.
- Cederberg, C., Mattsson, B., 2000. Life cycle assessment of milk production: a comparison of conventional and organic farming. *J. Clean. Prod.* *8*, 49-60
- de Figueirêdo, et al., 2014. Life cycle assessment of Brazilian cashew. Proceedings of the 9th International Conference on Life Cycle Assessment in the Agri-Food Sector (LCA Food 2014), San Francisco, California, USA, 8-10 October, 2014 American Center for Life Cycle Assessment: Vashon, 2014; pp 395-404.
- Ekoweb, 2015. Ekologisk livsmedelsmarknad. Rapport om den ekologiska branschen sammanställd av Ekoweb.nu.
- EPD, 2013. Environmental Product Declaration (EPD) of Organic Wine Pietracalda Fiano di Avellino DOCG. Feudi San Gregorio SpA. Registration number S-P-00498.
- EPD, 2014. Environmental Product Declaration (EPD) of Carlsberg Beer. Carlsberg Italia SpA. Registration number S-P-00498.
- EPD, 2015. Environmental Product Declaration (EPD) of Recoveco Vendimia Seleccionada wine. Gil Berzal Winery. Registration number S-P-00650.
- Guerici, M.; Knudsen, M.T.; Bava, L.; Zucali, M.; Schoenbach, P.; Kristensen, T. Parameters affecting the environmental impact of a range of dairy farming systems in Denmark, Germany and Italy. *Journal of Cleaner Production* **2013**, *54*, 133-141.
- Hallström, E., Carlsson-Kanyama, A., Börjesson, P., 2015. Environmental impact of dietary change: a systematic review. *Journal of Cleaner Production* *91*, 1-11.
- Jordbruksverket, 2012. Ett klimatvänligt jordbruk 2050. Rapport 2012: 35.
- Knudsen, 2013. LCA of Organic Food. Online. Available at [http://pure.au.dk/portal/files/40217479/110905\\_Life\\_Cycle\\_Assessment\\_LCA\\_of\\_organic\\_food\\_.pdf](http://pure.au.dk/portal/files/40217479/110905_Life_Cycle_Assessment_LCA_of_organic_food_.pdf)
- LCA Food, 2003. LCA data on basic food products produced and consumed in Denmark.

- Leinonen et al., 2012 Predicting the environmental impacts of chicken systems in the United Kingdom through a life cycle assessment: egg production systems. *Poult. Sci.*, 91 (2012), 26-40.
- Orlich et al., 2014. Patterns of food consumption among vegetarians and non-vegetarians. *Br J Nutr* 112, 1644-1653.
- SCB. Statistics Sweden (SCB). The future population of Sweden 2015–2060. Sweden 2015.
- SCB, 2013. Livsmedelsförsäljningsstatistik 2012-Livsmedelsförsäljningen inom detaljhandeln.
- SCB, 2014. Livsmedelsförsäljningsstatistik 2013-Livsmedelsförsäljningen inom detaljhandeln.
- SCB, 2014b, Allt mer pengar läggs på ekologiska livsmedel Online. Available at <http://www.scb.se/sv/hitta-statistik/artiklar/okad-forsaljning-av-ekologiska-livsmedel/>
- Sonesson, U., Anteson, F., Davis, J., Sjoden, P.O., 2005. Home transport and wastage: environmentally relevant household activities in the life cycle of food. *Ambio* 34, 371-375.
- Systembolaget, 2014. Systembolagets försäljning, Ekologiskt odlade produkter, 2014.
- Williams, A.G., Audsley, E., Sandars, D.L., 2006. Determining the Environmental Burdens and Resource Use in the Production of Agricultural and Horticultural Commodities (Defra Project Report IS0205). Cranfield University and Defra, Bedford, p. 97.
- Willer, H.; Lernoud, J. The World of Organic Agriculture. Statistics and Emerging Trends.; Bonn, Germany, 2015.
- Williams, A., Audsley, E., Sandars, D., 2010. Environmental burdens of producing bread wheat, oilseed rape and potatoes in England and Wales using simulation and system modelling. *Int. J. Life Cycle Assess.* 15, 855e868.
- Åström, S.; Roth, S.; Wranne, J.; Jelse, K.; Lindblad, M. Food Consumption Choices and Climate Change. Report B2091. IVL-Swedish Environmental Research Institute: Stockholm, Sweden, 2013.
